# Supplementary material
Source: Springer Nature journal article supplement (https://www.springermedizin.de/resource/supplementary/13063_2013_2063_MOESM3_ESM.pdf/9621302)

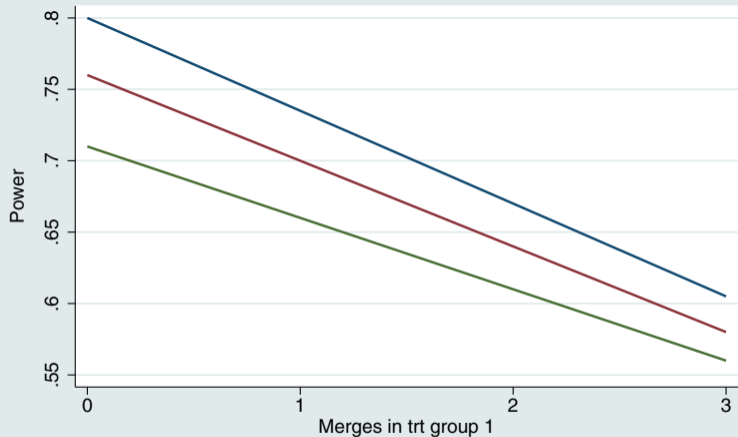

— Merges in trt group 2 = 0

— Merges in trt group 2 = 1

— Merges in trt group 2 = 2

Supplement: MOESM3 [file 9621302]
